# Supplementary material for: Association of Blood Leukocytes and Hemoglobin with Hospital Mortality in Acute Pulmonary Embolism
Source: Preprints.org preprint supplement (doi:10.20944/preprints202308.2072.v1), 2023-08-30
Supplement: Supplementary file 3 [file supplementary]

Supplementary Materials

Association of blood leukocytes and hemoglobin with hospital mortality in acute pulmonary embolism

Obradovic Slobodan1,2, Dzudovic Boris2,3*, Subotic Bojana1, Salinger Sonja4,5, Matijasevic Jovan6,7, Benic Marija6, Kovacevic Tamara8,9, Kovacevic-Kuzmanovic Ana10, Mitevska Irena11, Miloradovic Vladimir13,14, Jevtic Ema13, and Neskovic Aleksandar15,16

1 Clinic of Cardiology, Military Medical Academy of Belgrade, Serbia

2 School of Medicine, University of Defense, Belgrade, Serbia

3 Clinic of Emergency Internal Medicine, Military Medical Academy, Belgrade, Serbia

4 Clinic of Cardiology, Clinical Center Nis, Serbia

5 School of Medicine, University of Nis, Serbia

6 Institute of Pulmonary Diseases Vojvodina, Novi Sad, Serbia

7 School of Medicine, University of Novi Sad, Serbia

8 Clinic of Cardiology, Clinical Center Banja Luka, Bosnia and Herzegovina

9 School of Medicine, University of Banja Luka, Bosnia and Herzegovina

10 General Hospital Pancevo, Serbia

11 University Cardiology Clinic, Intensive Care Unit, Skopje, North Macedonia

12 Clinic of Cardiology, Clinical Center Kragujevac, Serbia,

13 School of Medicine, University of Kragujevac, Serbia

14 Clinic of Cardiology, University Clinical Center Zemun, Serbia

15 School of Medicine, University of Belgrade, Serbia

***** Correspondence: dzuda1977@gmail.com (BDZ)

**
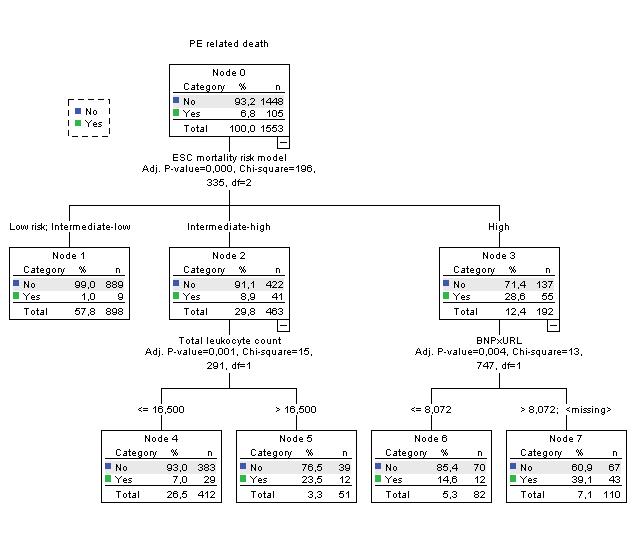
**

**Figure S1.** Decision tree using ESC mortality risk model, TLC, and BNP or NTproBNP x URL.

| 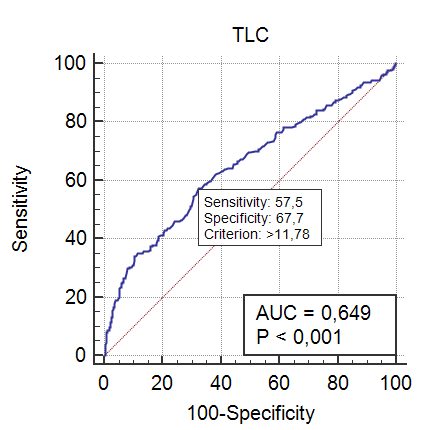 | 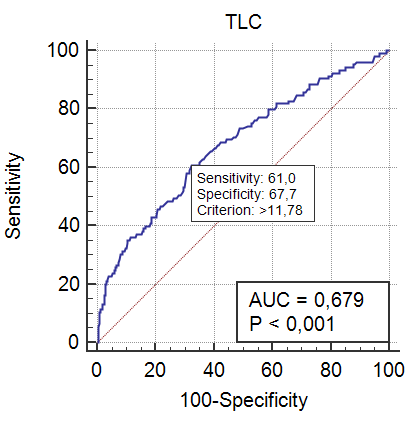 |
| --- | --- |
| (**a**) | (**b**) |

**Figure S2.** ROC curves for TLC for the prediction of all-cause (panel a) and PE related (panel b) hospital death. TLC level of >11.78x109/L has PPV=17,6% and NPV = 93% for all-cause death and PPV=12,1% and NPV = 96% for PE related hospital death.

| 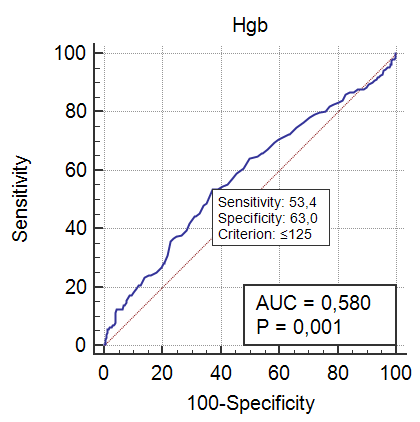 | 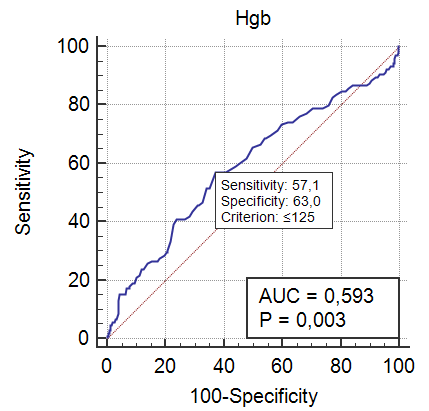 |
| --- | --- |
| (**a**) | (**b**) |

**Figure S3.** ROC curves for Hb levels for the prediction of all-cause (panel a) and PE related (panel b) hospital death. TLC level of >11.78x109/L has PPV=17,6% and NPV = 93% for all-cause death and PPV=12,1% and NPV = 96% for PE related hospital death.
